# Supplementary material for: FKN/CX3CR1 axis facilitates migraine-Like behaviour by activating thalamic-cortical network microglia in status epilepticus model rats
Source: Springer Nature journal article supplement (doi:10.1186/s10194-022-01416-w), 2022-04-05

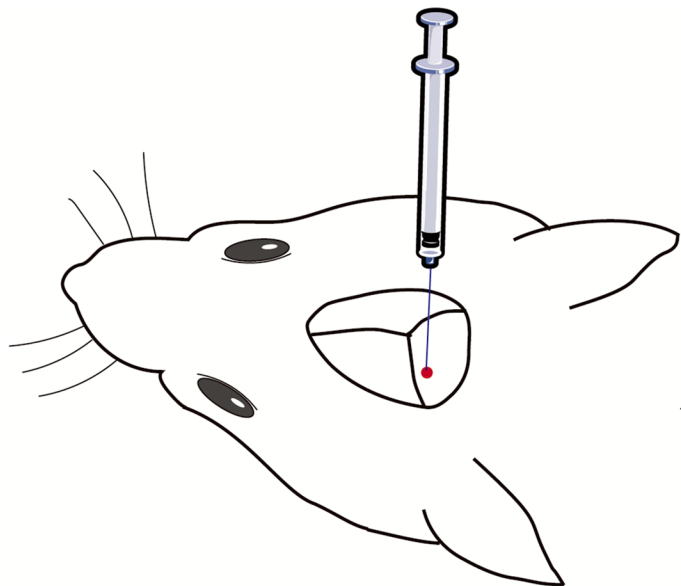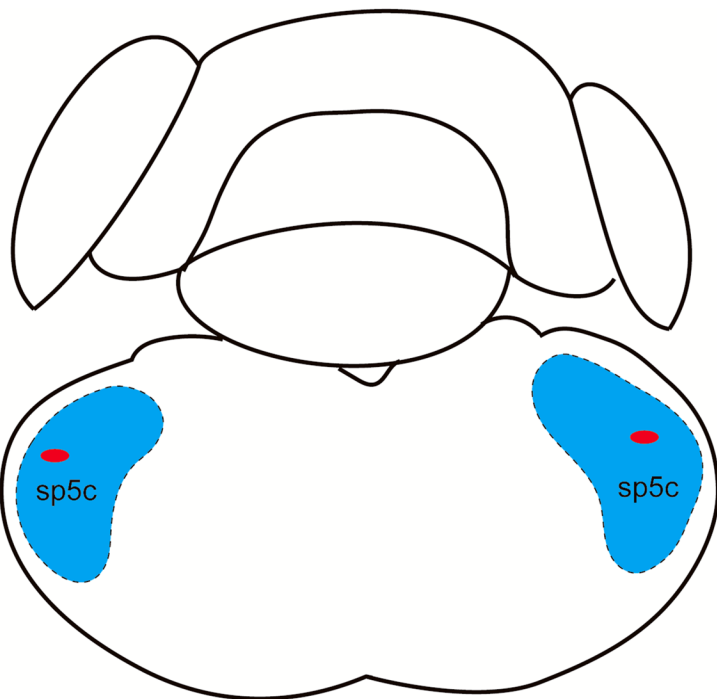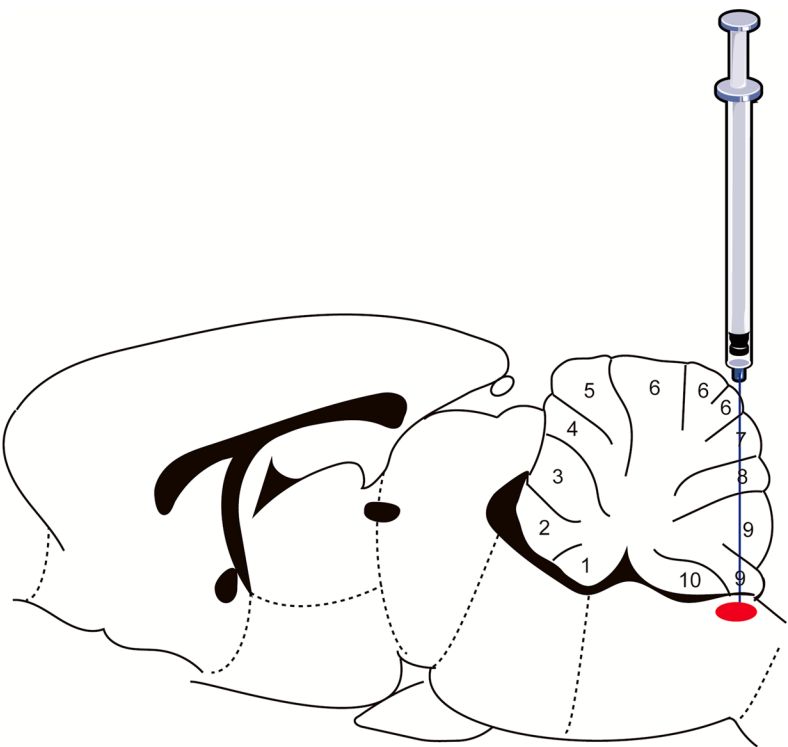

Supplement: MOESM1 [file 20286304]
